# Supplementary material
Source: publisher site journal article supplement (https://www.dovepress.com/article/411864)
Supplement: Supplementary file 1 [file get_supplementary_file.php]

Supplementary material 1: patient file

**Identification number……….**

1. **Socio-demographic variables**
   1. **Nationality**………
   2. **Place of residency**………...
   3. **Place of birth**…...

4) **Age:** ……….

1. **Gender:** 1. Female 2. Male
2. **Marital Status:** 1. Single 2. Married 3. Divorced 4. Widowed
3. **Number of child:** 1. More than 4 2. 3- 4 3. 1-2 4. No children
4. **Number of co-residents by room:** ……
5. **Occupation:** 1. Self-employed 2. Employed 3. Unemployed 4. Retired 5.

others

1. **Education:** 1. Illiterate 2. Primary 3. High school 4.University

# Anthropometric measurements

- 1. Height (cm)…….… 2)Weight (Kg)……….

3)Waist circumference (cm)………. 4) Hip circumference (cm)………

1. **Arterial pressure** (mm Hg) - Systolic/Diastolic: **4. Heart rate** (beats/min):

# SpO2:

1. **Blood tests (fasting state)**

| Cholesterol  (mmol/L) | Triglycerides  (mmol/L) | Glycemia (mmol/L**)** | HbA1C |
| --- | --- | --- | --- |
|  |  |  |  |

# Did you smoke cigarettes, cigars, pipes, water pipes, cigarillos in the past 6 months?

- 1. No 2) Ex smoker: stopped since 3) Yes

1. **If Yes,** how many cigarettes or cigars /day (in case of cigarettes or cigars smoking): 1)1-4 2) 5-14 3)15-24 4)25-34 5) 35-44 6)45+
2. **If Yes,** how many water pipes /week (in case of water pipes smoking):
   1. 1 per week 2) 2-3 per week 3) >3 per week

# Are you exposed to smoke more than 4 hours per day?

- 1. Yes 2) No

1. **Do you drink alcohol?** 1) No 2) Yes **If Yes,** how many glasses/day (specify the drink):
2. **Physical activity:**1) No 2) Yes
3. **If Yes,** how many hours/week? 1) <4h 2) >4h
4. **Do you have any allergy? 1) No** 2) Yes **14. If Yes,** specify:

# Have you had any of this clinician - diagnosed illnesses?

- 1. Diabetes mellitus (type 2) 2) Dyslipidemia 3) Hypertension
     1. Cancer
     2. Cardiovascular disease such as Myocardial infarction, coronary bypass, stroke
     3. Others (specify)

1. **Have you had any surgery?** 1) No 2) Yes (specify)

# Are you taking any regular medication?

- 1. No 2) Yes

**If Yes,** which of the following are you taking? (specify the brand name)

1. Cholesterol lowering drugs
2. Hypoglycemic drugs
3. Anti-hypertensive drugs
4. Female hormones
5. Others (specify)

# Do you currently take multi-vitamins?

- 1. No 2) Yes (specify the brand name)

1. **If Yes,** how many tablets/per week (for the last six months)?

1) 2 or less 2) 3-5 3) 6-9 4) 10 or more

# Do you currently take supplements? (such as fish oil or others)

- 1. No 2) Yes

1. **If Yes,** how many tablets/per week (for the last six months)

1) 2 or less 2) 3-5 3) 6-9 4)10 or more

1. **If** you are currently taking them, what brand do you usually use and the exact dose/day (Specify)? ...............................
2. **Family history of disease** 1)No 2) Yes
3. **If Yes,** tick the appropriate box

|  | **Excess in weight/**  **Obesity** | **Type 2 Diabetes** | **Dyslipidemia** | **HTN** | **CVD** | **Fatty liver** | **Cancer** |
| --- | --- | --- | --- | --- | --- | --- | --- |
| Father |  |  |  |  |  |  |  |
| Mother |  |  |  |  |  |  |  |
| Brother/s |  |  |  |  |  |  |  |
| Sister/s |  |  |  |  |  |  |  |
| Daughter/s  Son/s |  |  |  |  |  |  |  |

1. **ECG** 1) Sinus rhythm 2) Irregular rythm

# Physical exam

- Cardiovascular system
- Respiratory system
- Lower limb edema
- Peripheral pulse

# Clinical recommendations
